# Supplementary material for: Highly selective conversion of phenol to cyclohexanol over Ru/Nb2O5-nC18PA catalysts with increased acidity in a biphasic system under mild conditions
Source: Royal Society of Chemistry journal article supplement (doi:10.1039/d1gc04046d), 2021-12-13
Supplement: d1gc04046d2.pdf [file d1gc04046d2.pdf]

Supplementary Information:

**Highly selective conversion of phenol to cyclohexanol over  
increased acidity on the Ru/Nb<sub>2</sub>O<sub>5</sub>-nC18PA catalysts in biphasic  
system under mild condition**

Jiahui Zhan<sup>a, b</sup>, Rui Hu<sup>a, b</sup>, Xi Luo<sup>a, b</sup>, Cheng Zhang<sup>c, \*</sup>, Gang Luo<sup>a, b</sup>, Jiajun Fan<sup>d</sup>,  
James H. Clark<sup>a, b, d</sup>, Shicheng Zhang<sup>a, b, \*</sup>

<sup>a</sup> Shanghai Technical Service Platform for Pollution Control and Resource Utilization of Organic  
Wastes, Shanghai Key Laboratory of Atmospheric Particle Pollution and Prevention (LAP3),  
Department of Environmental Science and Engineering, Fudan University, Shanghai 200438, China.

<sup>b</sup> Shanghai Institute of Pollution Control and Ecological Security, Shanghai, 200092, China.

<sup>c</sup> College of Environmental and Resource Sciences, Zhejiang A&F University, Hangzhou 311300,

China

<sup>d</sup> Green Chemistry Centre of Excellence, Department of Chemistry, University of York, York, YO10

5DD, UK

\*Corresponding author: zhangsc@fudan.edu.cn

success.zhang@zafu.edu.cn

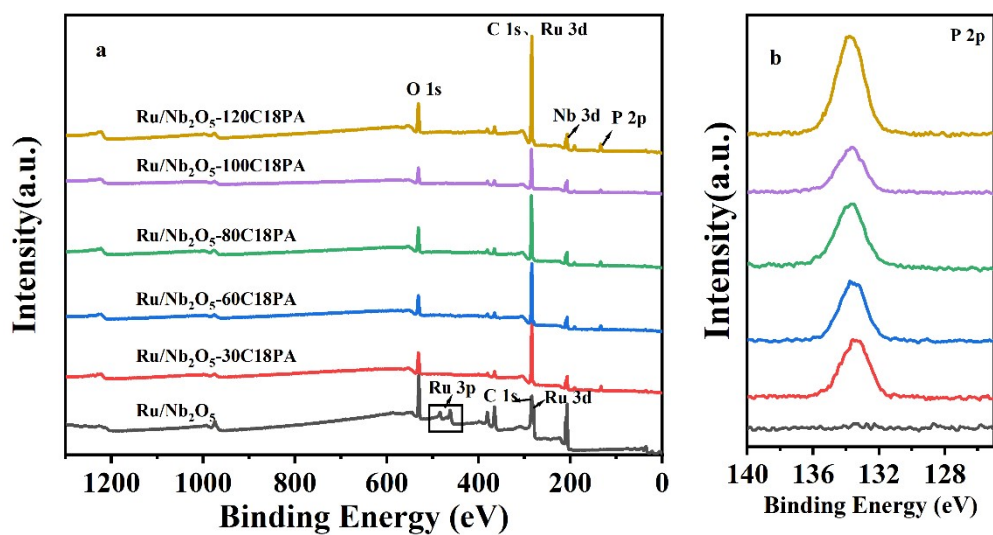

**Fig. S1** XPS spectra in all element and P 2p regions for the Ru/Nb<sub>2</sub>O<sub>5</sub>-nC18PA catalysts.

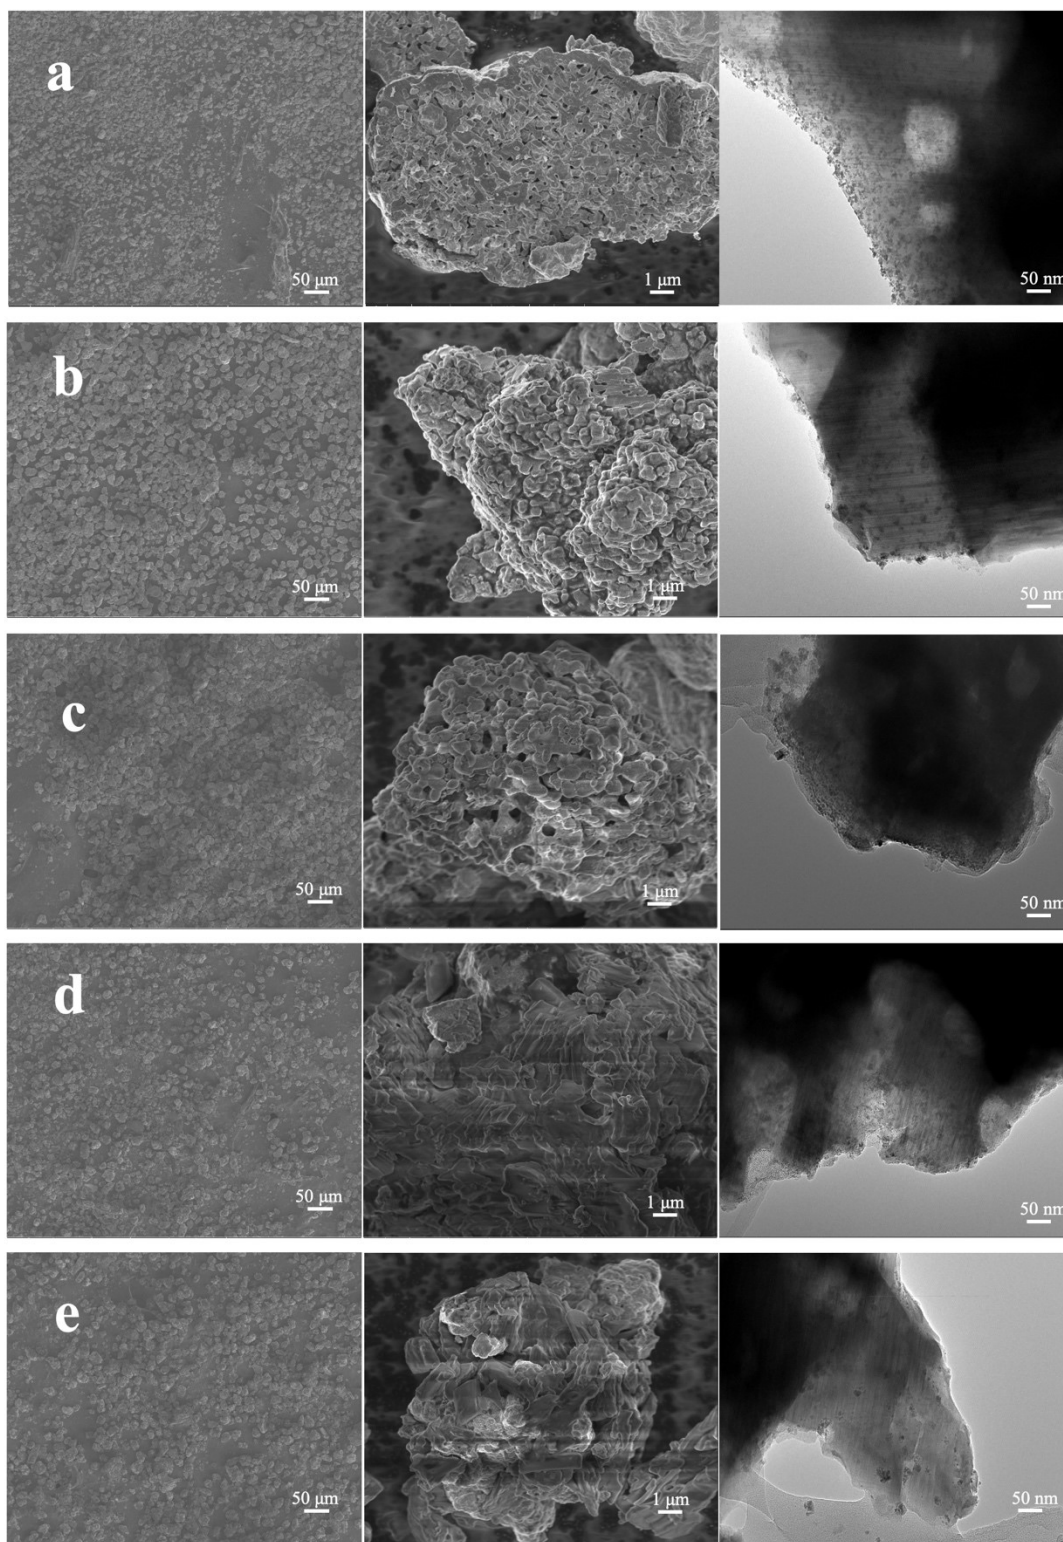

**Fig. S2** SEM images (first column and second column) and TEM images (third column) of the Ru/Nb<sub>2</sub>O<sub>5</sub> (a), Ru/Nb<sub>2</sub>O<sub>5</sub>-30C18PA (b), Ru/Nb<sub>2</sub>O<sub>5</sub>-60C18PA (c), Ru/Nb<sub>2</sub>O<sub>5</sub>-80C18PA (d), Ru/Nb<sub>2</sub>O<sub>5</sub>-120C18PA (e) catalyst.

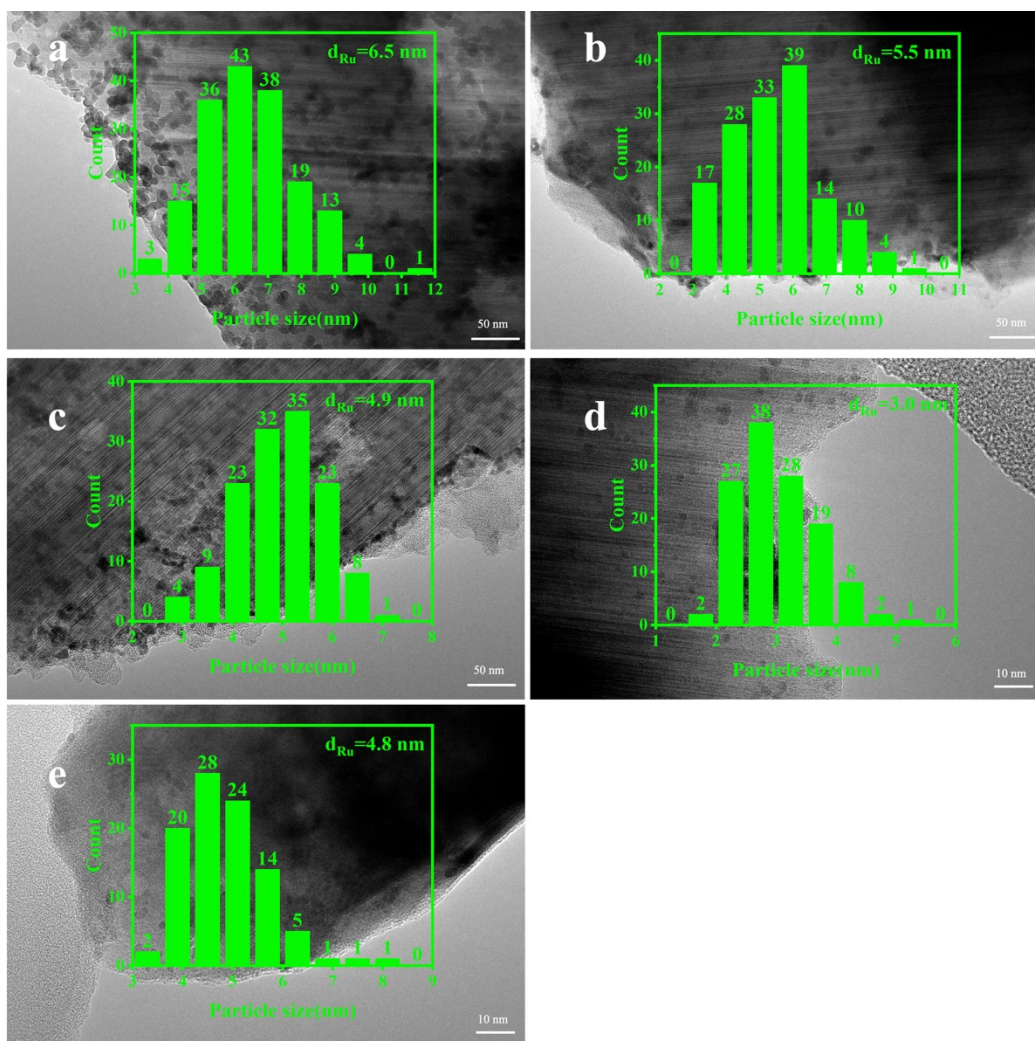

**Fig. S3** TEM images of the Ru/Nb<sub>2</sub>O<sub>5</sub> (a), Ru/Nb<sub>2</sub>O<sub>5</sub>-30C18PA (b), Ru/Nb<sub>2</sub>O<sub>5</sub>-60C18PA (c), Ru/Nb<sub>2</sub>O<sub>5</sub>-80C18PA (d), Ru/Nb<sub>2</sub>O<sub>5</sub>-120C18PA (e) catalyst with the corresponding Ru nanoparticle size distribution histogram.

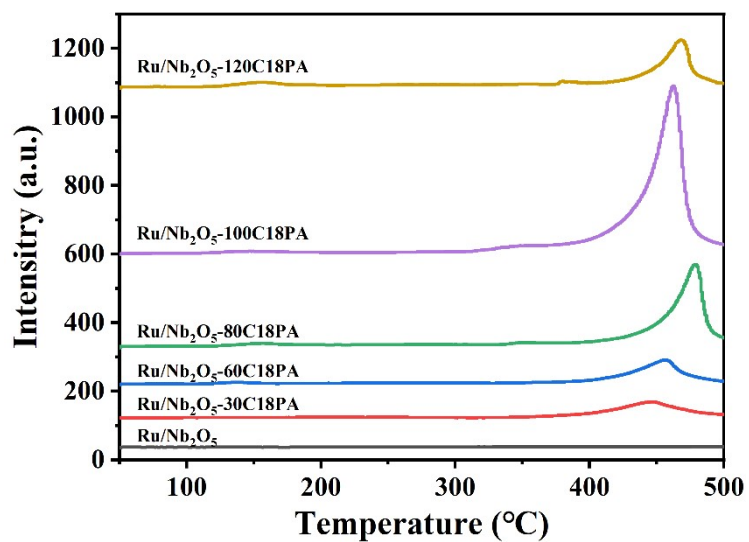

**Fig. S4** NH<sub>3</sub>-TPD profiles of the Ru/Nb<sub>2</sub>O<sub>5</sub>-nC18PA catalysts.

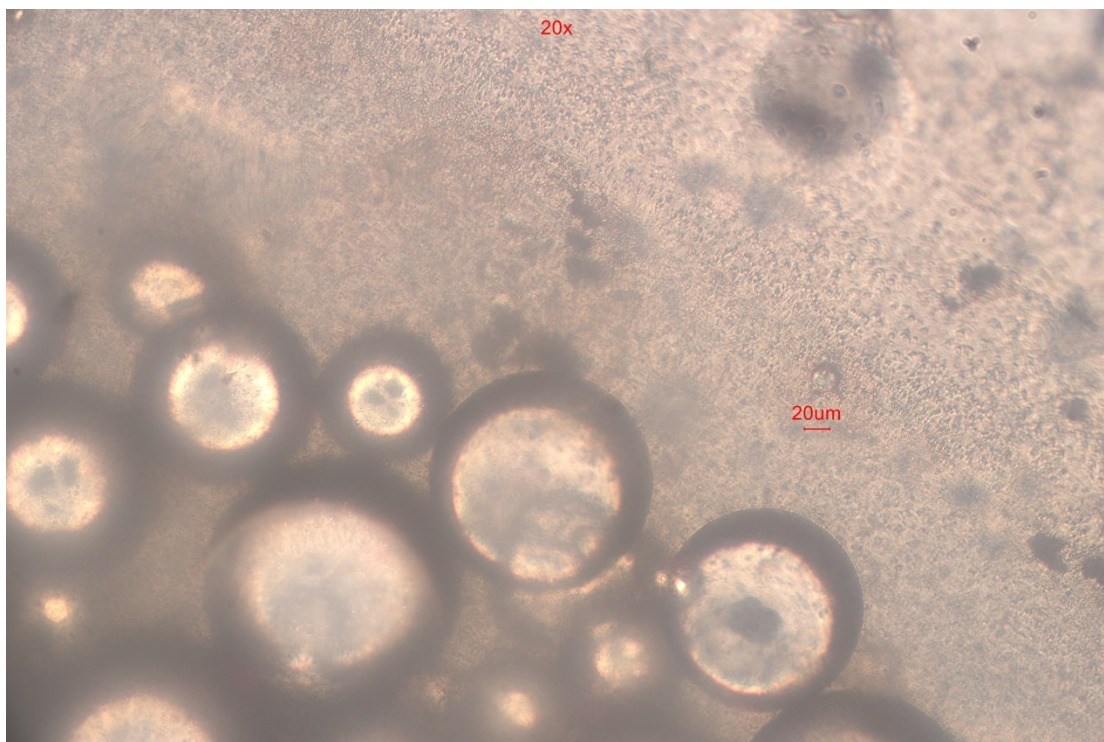

**Fig. S5** Color photograph of the emulsion prepared from the Ru/Nb<sub>2</sub>O<sub>5</sub>-100C18PA catalyst.

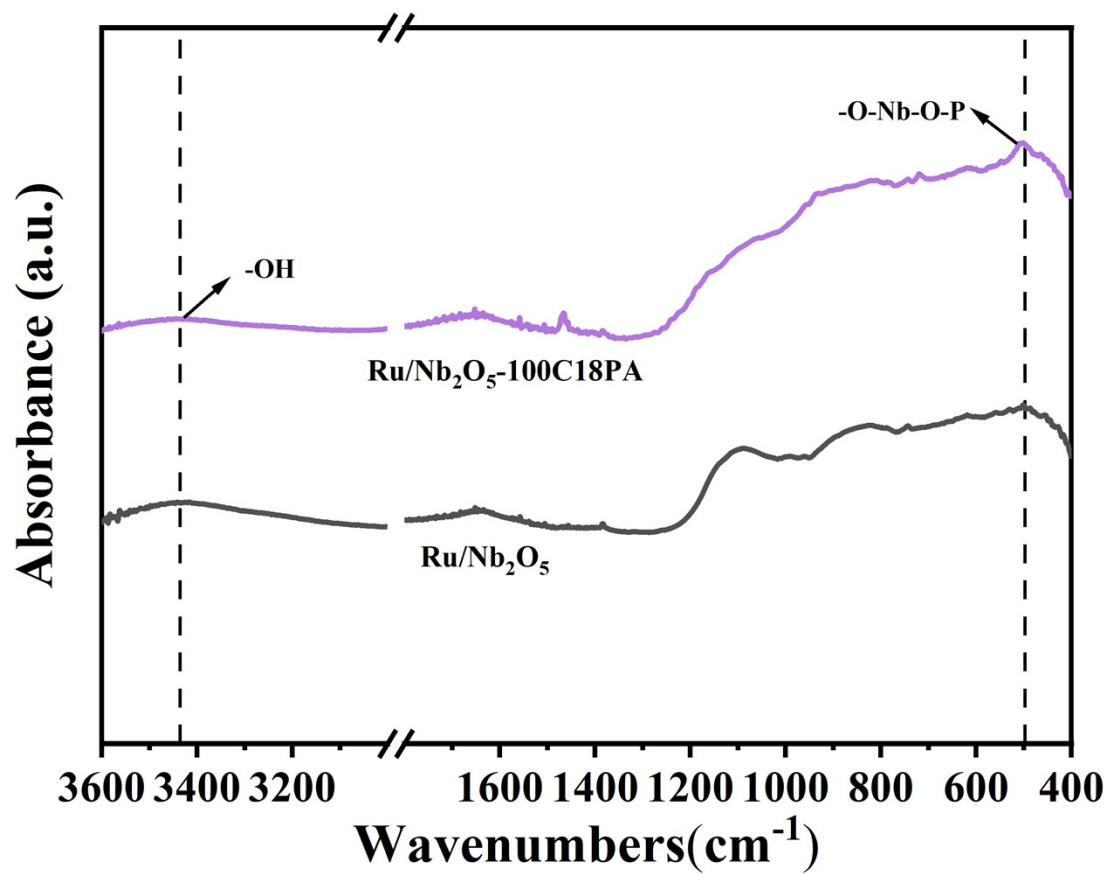

Fig. S6 FTIR spectra for the Ru/Nb<sub>2</sub>O<sub>5</sub> and Ru/Nb<sub>2</sub>O<sub>5</sub>-100C18PA catalysts

**Table S1** Summary of the binding energy in the high-resolution XPS Ru 3d and C 1s spectra of the Ru/Nb<sub>2</sub>O<sub>5</sub>-nC18PA catalysts.

| Catalysts                                   | Ru 3d <sub>3/2</sub> |         |                            | C 1s   |        |        |
|---------------------------------------------|----------------------|---------|----------------------------|--------|--------|--------|
|                                             | Ru (0)               | Ru (+4) | Ru (0)<br>(%) <sup>#</sup> | C-C    | C-O    | C=O    |
| Ru/Nb <sub>2</sub> O <sub>5</sub>           | 284.35               | 285.17  | 10.85                      | 283.82 | 284.80 | 286.01 |
| Ru/Nb <sub>2</sub> O <sub>5</sub> -30C18PA  | 284.28               | 284.97  | 14.48                      | 283.74 | 284.63 | 285.68 |
| Ru/Nb <sub>2</sub> O <sub>5</sub> -60C18PA  | 284.17               | 284.85  | 18.55                      | 283.53 | 284.49 | 285.40 |
| Ru/Nb <sub>2</sub> O <sub>5</sub> -80C18PA  | 284.45               | 285.13  | 22.67                      | 284.33 | 284.81 | 286.18 |
| Ru/Nb <sub>2</sub> O <sub>5</sub> -100C18PA | 284.39               | 285.06  | 27.96                      | 283.91 | 284.73 | 285.36 |
| Ru/Nb <sub>2</sub> O <sub>5</sub> -120C18PA | 284.36               | 284.95  | 23.20                      | 284.09 | 284.66 | 285.74 |

<sup>#</sup> Ru (0) \*100 / (Ru (0) + Ru (+4) ).



**Table S2** Summary of the binding energy and calculated atomic concentrations in the high-resolution XPS O 1s spectra of the Ru/Nb<sub>2</sub>O<sub>5</sub>-nC18PA catalysts.

| Catalysts                                   | O 1s                |                     |                                                        |
|---------------------------------------------|---------------------|---------------------|--------------------------------------------------------|
|                                             | O <sub>α</sub> (eV) | O <sub>β</sub> (eV) | O <sub>α</sub> / (O <sub>α</sub> +O <sub>β</sub> ) (%) |
| Ru/Nb <sub>2</sub> O <sub>5</sub>           | 530.99              | 530.22              | 38.80                                                  |
| Ru/Nb <sub>2</sub> O <sub>5</sub> -30C18PA  | 532.25              | 530.53              | 46.67                                                  |
| Ru/Nb <sub>2</sub> O <sub>5</sub> -60C18PA  | 532.33              | 530.53              | 49.62                                                  |
| Ru/Nb <sub>2</sub> O <sub>5</sub> -80C18PA  | 532.12              | 530.49              | 51.32                                                  |
| Ru/Nb <sub>2</sub> O <sub>5</sub> -100C18PA | 532.20              | 530.39              | 51.55                                                  |
| Ru/Nb <sub>2</sub> O <sub>5</sub> -120C18PA | 532.48              | 530.63              | 50.80                                                  |

**Table S3** Summary of the binding energy and full-width half-maximum (FWHM) values in the high-resolution XPS Nb 3d spectra of the Ru/Nb<sub>2</sub>O<sub>5</sub>-nC18PA catalysts.

| Catalysts                                   | Nb <sub>2</sub> O <sub>5</sub> 3d <sub>5/2</sub> (eV) |           | Nb <sub>2</sub> O <sub>5</sub> 3d <sub>3/2</sub> (eV) |           |
|---------------------------------------------|-------------------------------------------------------|-----------|-------------------------------------------------------|-----------|
|                                             | BE (eV)                                               | FWHM (eV) | BE (eV)                                               | FWHM (eV) |
| Ru/Nb <sub>2</sub> O <sub>5</sub>           | 207.29                                                | 1.29      | 210.03                                                | 1.24      |
| Ru/Nb <sub>2</sub> O <sub>5</sub> -30C18PA  | 207.24                                                | 1.38      | 209.97                                                | 1.35      |
| Ru/Nb <sub>2</sub> O <sub>5</sub> -60C18PA  | 207.19                                                | 1.38      | 209.93                                                | 1.32      |
| Ru/Nb <sub>2</sub> O <sub>5</sub> -80C18PA  | 207.34                                                | 1.36      | 210.07                                                | 1.32      |
| Ru/Nb <sub>2</sub> O <sub>5</sub> -100C18PA | 207.27                                                | 1.32      | 210.01                                                | 1.28      |
| Ru/Nb <sub>2</sub> O <sub>5</sub> -120C18PA | 207.20                                                | 1.37      | 209.93                                                | 1.32      |

**Table S4** Surface areas and porosities of the Ru/Nb<sub>2</sub>O<sub>5</sub>-nC18PA catalysts.

| Catalysts                                   | S <sub>BET</sub> <sup>a</sup> (m <sup>2</sup> /g) | S <sub>micro</sub> <sup>b</sup> (m <sup>2</sup> /g) | V <sub>total</sub> <sup>c</sup> (cm <sup>3</sup> /kg) | Average pore diameter (nm) |
|---------------------------------------------|---------------------------------------------------|-----------------------------------------------------|-------------------------------------------------------|----------------------------|
| Nb <sub>2</sub> O <sub>5</sub>              | 72.07                                             | 0.00                                                | 0.043                                                 | 2.37                       |
| Ru/Nb <sub>2</sub> O <sub>5</sub>           | 38.08                                             | 0.00                                                | 0.030                                                 | 3.16                       |
| Ru/Nb <sub>2</sub> O <sub>5</sub> -30C18PA  | 33.63                                             | 0.00                                                | 0.027                                                 | 5.04                       |
| Ru/Nb <sub>2</sub> O <sub>5</sub> -60C18PA  | 25.48                                             | 0.00                                                | 0.019                                                 | 5.50                       |
| Ru/Nb <sub>2</sub> O <sub>5</sub> -80C18PA  | 22.84                                             | 0.00                                                | 0.028                                                 | 4.87                       |
| Ru/Nb <sub>2</sub> O <sub>5</sub> -100C18PA | 12.94                                             | 0.13                                                | 0.015                                                 | 4.49                       |
| Ru/Nb <sub>2</sub> O <sub>5</sub> -120C18PA | 14.10                                             | 0.11                                                | 0.024                                                 | 1.65                       |

<sup>a</sup> Specific surface area calculated by Brunauer-Emmett-Teller (BET) equation.

<sup>b</sup> Specific surface area of micro-pores calculated by the density functional theory (DFT) method.

<sup>c</sup> Total pore volume determined at P/P 0 = 0.99.

**Table S5** The contact angles and average particle size of Ru of the Ru/Nb<sub>2</sub>O<sub>5</sub>-nC18PA catalysts.

| Catalysts                                   | The contact angles(°) | Average particle size of Ru ( nm ) |
|---------------------------------------------|-----------------------|------------------------------------|
| Ru/Nb <sub>2</sub> O <sub>5</sub>           | 0                     | 6.47                               |
| Ru/Nb <sub>2</sub> O <sub>5</sub> -30C18PA  | 105.6                 | 5.52                               |
| Ru/Nb <sub>2</sub> O <sub>5</sub> -60C18PA  | 107.5                 | 4.94                               |
| Ru/Nb <sub>2</sub> O <sub>5</sub> -80C18PA  | 103.1                 | 3.02                               |
| Ru/Nb <sub>2</sub> O <sub>5</sub> -100C18PA | 104.3                 | 2.00                               |
| Ru/Nb <sub>2</sub> O <sub>5</sub> -120C18PA | 100.4                 | 4.81                               |

### Supplementary Note 1: Method of recycling catalysts

After each batch of the catalytic reaction is completed, the reactor is placed in a water tank and quickly cooled to room temperature. Then open the reactor and directly add the next batch of phenol to it, and finally proceed to the next catalytic reaction.
